# Supplementary material
Source: publisher figshare collection journal article supplement (https://acs.figshare.com/ndownloader/files/5196625)

The supporting figure shows the measured patterning rate constants as a function of temperature in an Arrhenius representation.

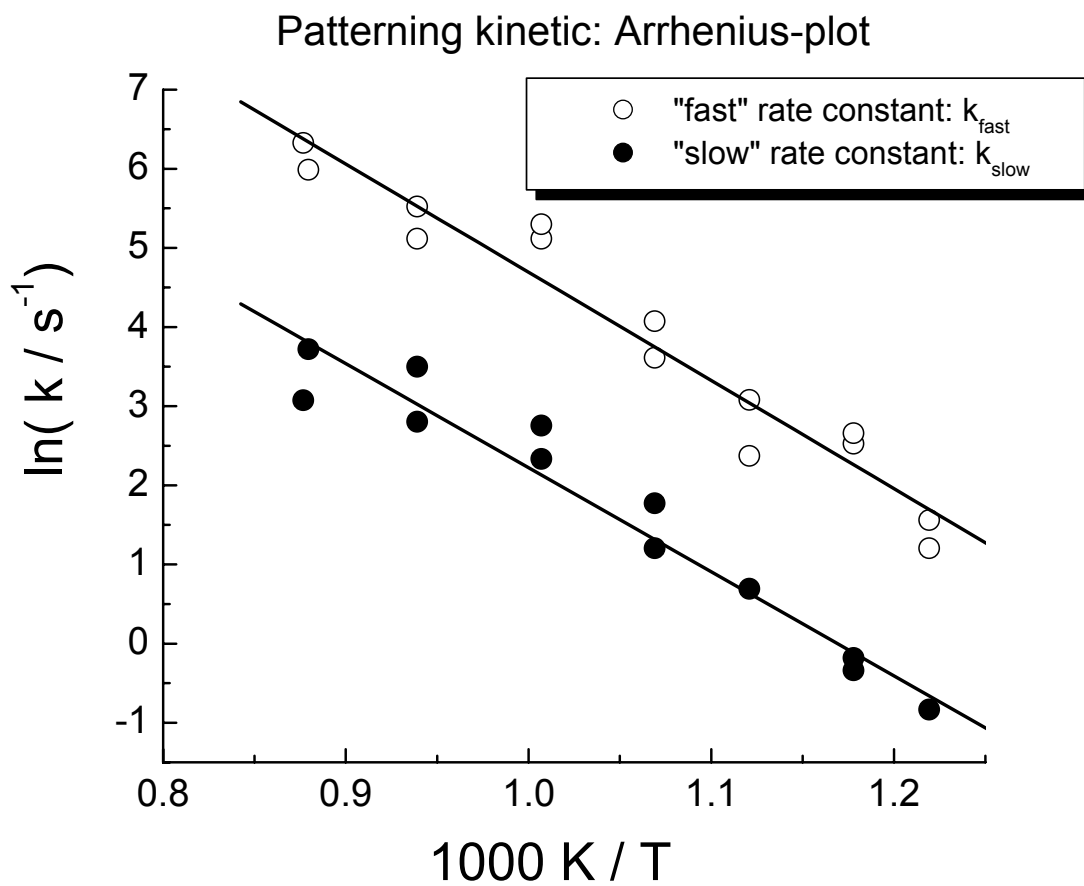

Supplement: Supplementary file 1 [file 5196625]
